# Supplementary figures and images for: Oncological and reproductive outcomes of endometrial atypical hyperplasia and endometrial cancer patients undergoing conservative therapy with hysteroscopic resection: A systematic review and meta‐analysis
Source: PubMed Central journal article supplement — Acta Obstet Gynecol Scand. 2024 Feb 21;103(8):1498–512. doi: 10.1111/aogs.14815 (PMC11266644; doi:10.1111/aogs.14815), 2024-02-21

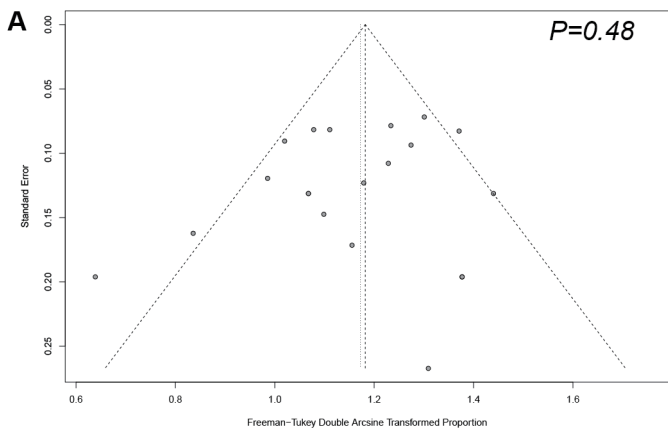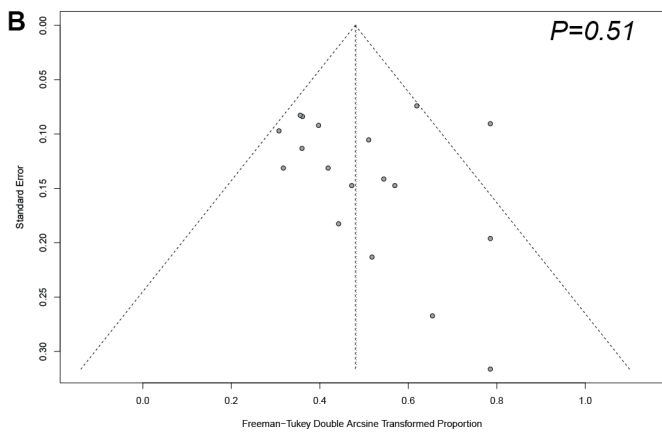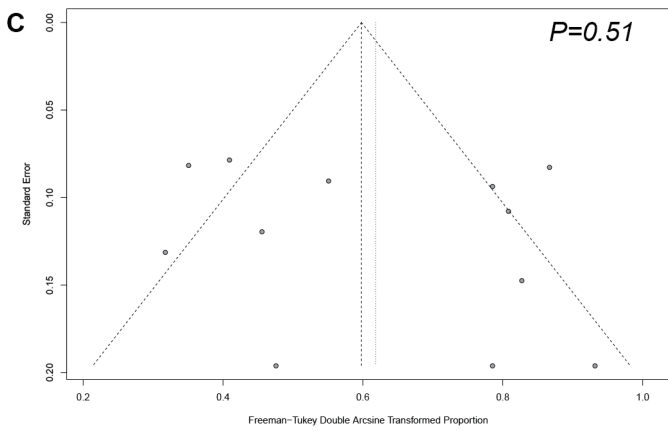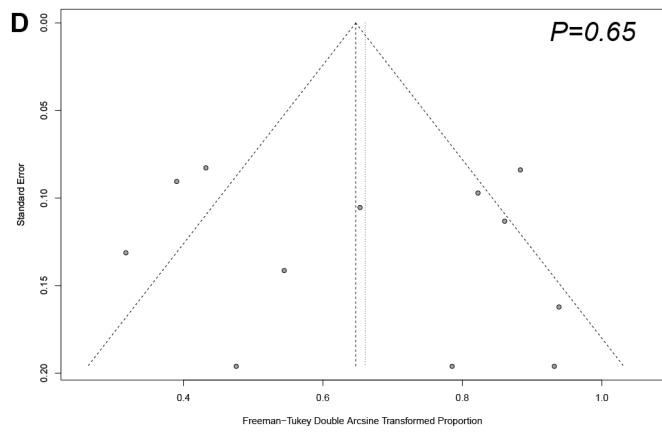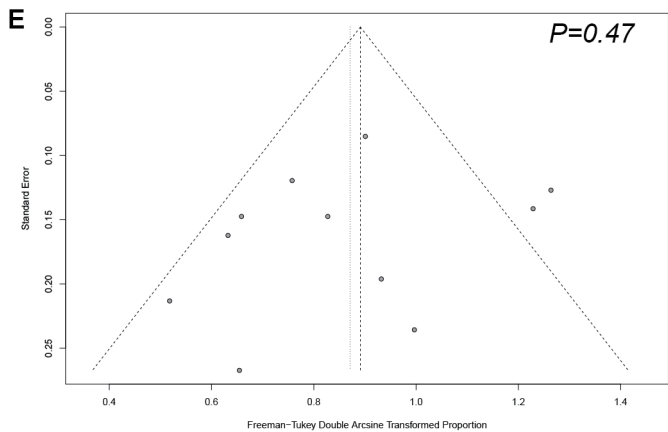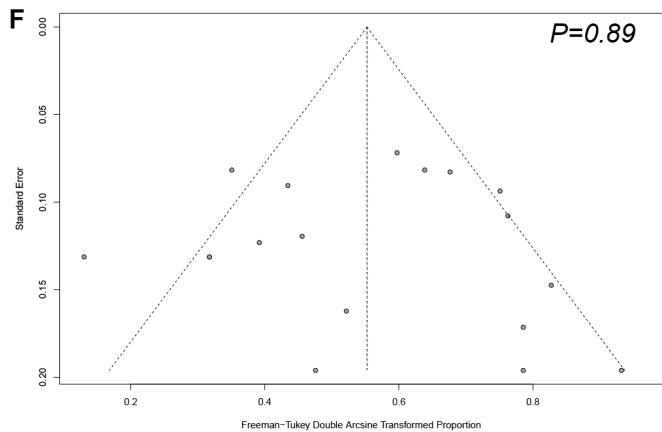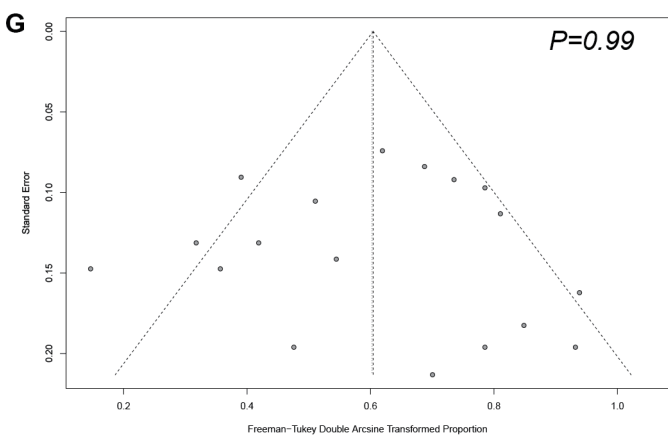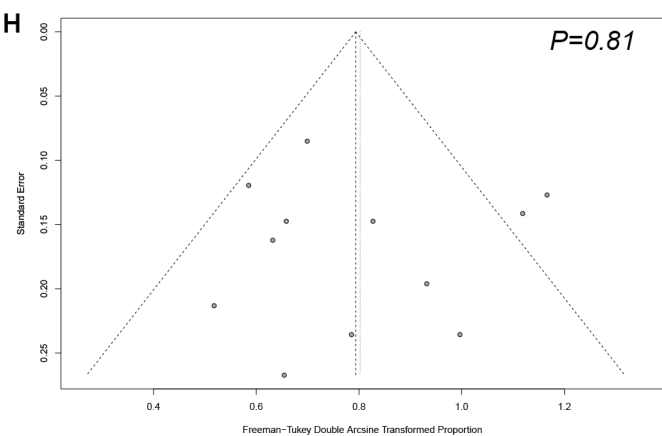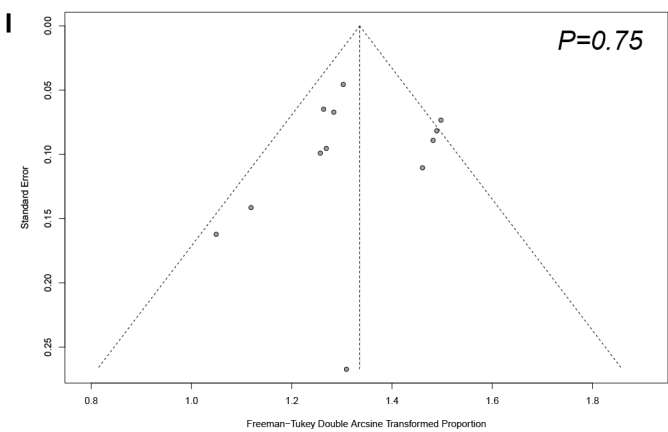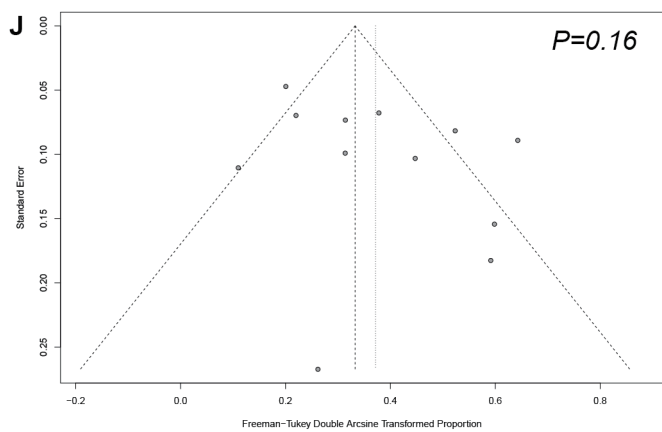

Supplement: AOGS-103-1498-s002.pdf [file AOGS-103-1498-s002.pdf]

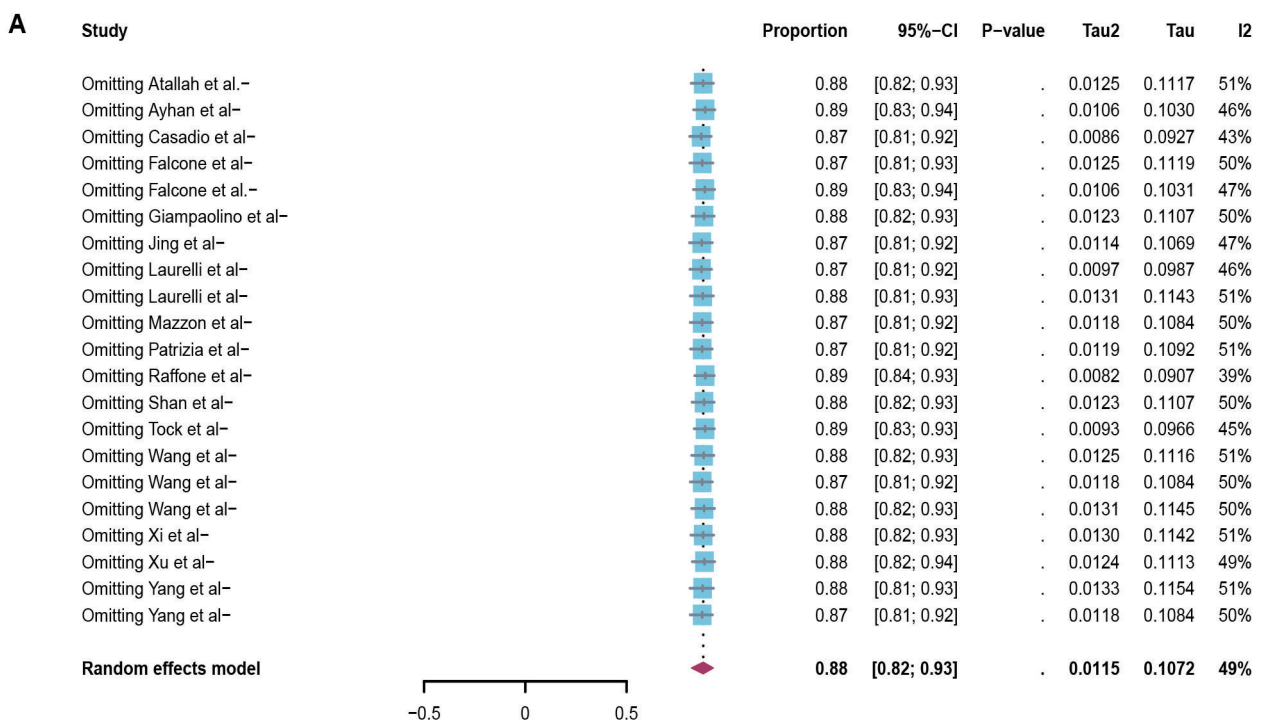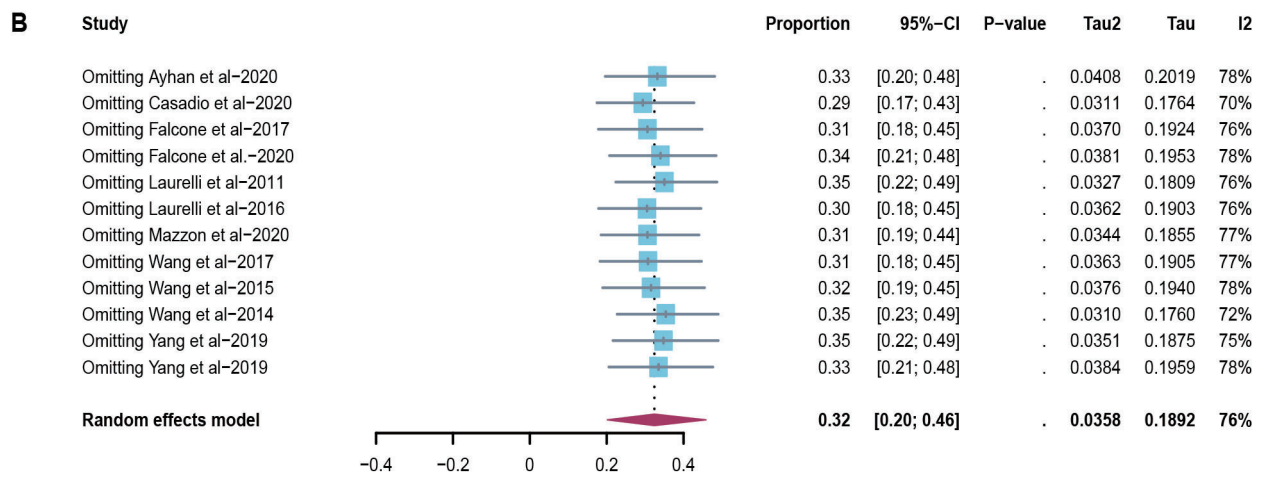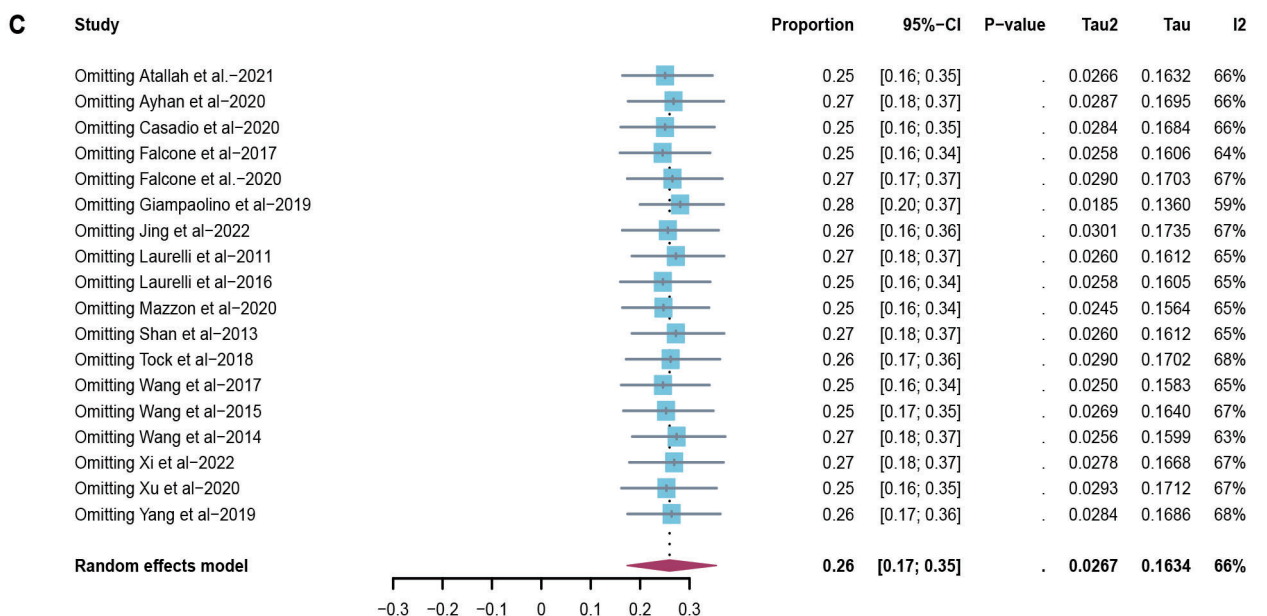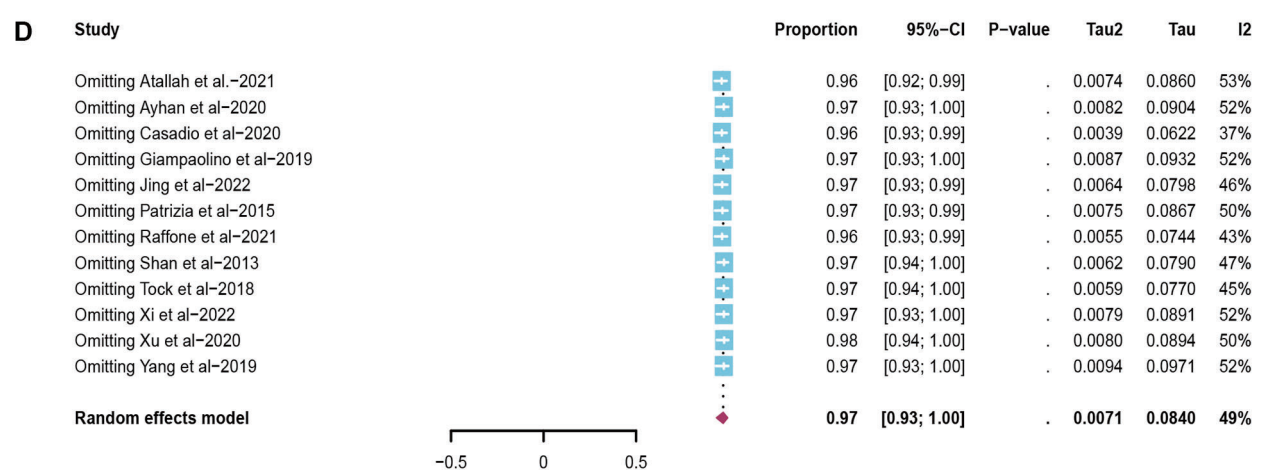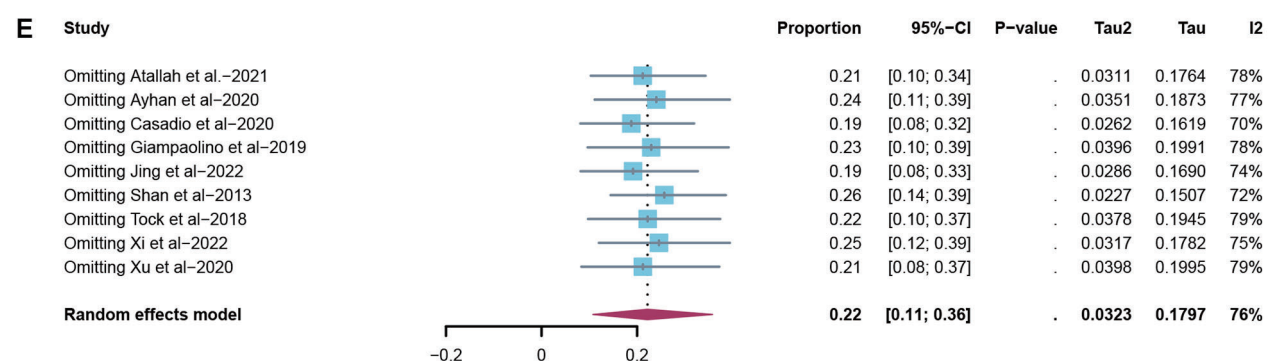

Supplement: AOGS-103-1498-s004.pdf [file AOGS-103-1498-s004.pdf]
